# Supplementary material for: Imbedding pancreaticojejunostomy used in pure laparoscopic pancreaticoduodenectomy for nondilated pancreatic duct
Source: Springer Nature journal article supplement (doi:10.1007/s00464-016-4805-1), 2017-01-11
Supplement: MOESM2 [file 11995044]

| **Table 2.**  **Long-term outcomes for patients** | |
| --- | --- |
| Follow-up time (months) | 5-16 |
| Mortality | 4(7.7%) |
| Time to death (months) | 9.2-14.2 |
| **Causes of death** |  |
| Local recurrence and other disease | 1 |
| Distant metastasis | 1 |
| Local recurrence and distant metastasis | 1 |
| Other disease | 1 |
| **Overall survival** |  |
| 0.5 year | 100% |
| 1 years | 98.1% |
| 1.5 years | 92.3% |
| **Disease-free survival** |  |
| 0.5 year | 100% |
| 1 years | 88.5% |
| 1.5years | 82.7% |
|  |  |
